# Supplementary material for: M(B(SeO3)3)H2O (M = Al, Ga): the first boroselenites with a unique sandwich like double-layer structure
Source: Royal Society of Chemistry journal article supplement (doi:10.1039/d1dt02890a), 2021-01-01
Supplement: d1dt02890a1.pdf [file d1dt02890a1.pdf]

$M(B(SeO_3)_3)H_2O$  ( $M=Al, Ga$ ): The first boroselenites with a unique sandwich like double-layer structure

Ming-Yang Cao<sup>a,b</sup>, Chun-Li Hu<sup>a</sup>, Fang Kong<sup>a</sup>, Zhe-Yao Xiong<sup>a,b</sup>, Jiang-Gao Mao<sup>\*a</sup>

<sup>a</sup> State Key Laboratory of Structural Chemistry, Fujian Institute of Research on the Structure of Matter, Chinese Academy of Sciences, Fuzhou 350002, China.

E-mail: [mjg@fjirsm.ac.cn](mailto:mjg@fjirsm.ac.cn)

<sup>b</sup> University of the Chinese Academy of Sciences, Beijing, 100049, China

## Supporting information

### Content

**Table S1.** Crystal data and structure refinements for  $\text{Al}(\text{B}(\text{SeO}_3)_3)\text{H}_2\text{O}$  and  $\text{Ga}(\text{B}(\text{SeO}_3)_3)\text{H}_2\text{O}$ .

**Table S2.** Selected bond lengths ( $\text{\AA}$ ) for  $\text{Al}(\text{B}(\text{SeO}_3)_3)\text{H}_2\text{O}$  and  $\text{Ga}(\text{B}(\text{SeO}_3)_3)\text{H}_2\text{O}$ .

**Table S3** Selected bond Angles ( $^\circ$ ) for  $\text{Al}(\text{B}(\text{SeO}_3)_3)\text{H}_2\text{O}$  and  $\text{Ga}(\text{B}(\text{SeO}_3)_3)\text{H}_2\text{O}$ .

**Table S4** Hydrogen bonds in  $\text{Al}(\text{B}(\text{SeO}_3)_3)\text{H}_2\text{O}$  and  $\text{Ga}(\text{B}(\text{SeO}_3)_3)\text{H}_2\text{O}$ .

**Table S5** Bond valence calculations for oxygen atoms in  $\text{Al}(\text{B}(\text{SeO}_3)_3)\text{H}_2\text{O}$  and  $\text{Ga}(\text{B}(\text{SeO}_3)_3)\text{H}_2\text{O}$ .

**Figure S1.** Powder X-ray diffraction patterns of  $\text{Al}(\text{B}(\text{SeO}_3)_3)\text{H}_2\text{O}$  (a) and  $\text{Ga}(\text{B}(\text{SeO}_3)_3)\text{H}_2\text{O}$  (b).

**Figure S2.** IR spectra of  $\text{Al}(\text{B}(\text{SeO}_3)_3)\text{H}_2\text{O}$  (a) and  $\text{Ga}(\text{B}(\text{SeO}_3)_3)\text{H}_2\text{O}$  (b).

**Figure S3.** Photograph of  $\text{Al}(\text{B}(\text{SeO}_3)_3)\text{H}_2\text{O}$  for the measurement of birefringence.

**Figure S4.** Photograph of  $\text{Ga}(\text{B}(\text{SeO}_3)_3)\text{H}_2\text{O}$  for the measurement of birefringence.

**Figure S5.** The calculated band structure of  $\text{Al}(\text{B}(\text{SeO}_3)_3)\text{H}_2\text{O}$  (a) and  $\text{Ga}(\text{B}(\text{SeO}_3)_3)\text{H}_2\text{O}$  (b).

**Figure S6.** The graphs of scissor-added partial density of states and the largest tensors for  $\text{Al}(\text{B}(\text{SeO}_3)_3)\text{H}_2\text{O}$  (a) and  $\text{Ga}(\text{B}(\text{SeO}_3)_3)\text{H}_2\text{O}$  (b).

**Table S1.** Crystal data and structure refinements for Al(B(SeO<sub>3</sub>)<sub>3</sub>)H<sub>2</sub>O and Ga(B(SeO<sub>3</sub>)<sub>3</sub>)H<sub>2</sub>O.

|                                                |                                                                  |                                                                  |
|------------------------------------------------|------------------------------------------------------------------|------------------------------------------------------------------|
| <b>Formula</b>                                 | Al(B(SeO <sub>3</sub> ) <sub>3</sub> )H <sub>2</sub> O           | Ga(B(SeO <sub>3</sub> ) <sub>3</sub> )H <sub>2</sub> O           |
| <b>Formula weight</b>                          | 434.80                                                           | 479.43                                                           |
| <b>Temperature</b>                             | 293(2)K                                                          | 293(2)K                                                          |
| <b>Wavelength</b>                              | 0.71073                                                          | 0.71073                                                          |
| <b>Space group</b>                             | <i>Pbca</i>                                                      | <i>Pbca</i>                                                      |
| <b>a (Å)</b>                                   | 8.4650(5)                                                        | 8.5773(5)                                                        |
| <b>b (Å)</b>                                   | 8.7788(7)                                                        | 8.8445(5)                                                        |
| <b>c (Å)</b>                                   | 21.9237(14)                                                      | 22.0195(13)                                                      |
| <b>Volume (Å<sup>3</sup>)</b>                  | 1629.21(19)                                                      | 1670.44(17)                                                      |
| <b>Z, Calculated density(g/cm<sup>3</sup>)</b> | 8, 3.545                                                         | 8, 3.813                                                         |
| <b>Absorption coefficient(mm<sup>-1</sup>)</b> | 13.695                                                           | 16.409                                                           |
| <b>F(000)</b>                                  | 1601.0                                                           | 1760.0                                                           |
| <b>Theta range for data collection</b>         | 3.716 to 54.206 deg                                              | 6.022 to 54.202 deg                                              |
| <b>Limiting indices</b>                        | -10 ≤ h ≤ 10, -11 ≤ k ≤ 8,<br>-28 ≤ l ≤ 27                       | -10 ≤ h ≤ 10, -11 ≤ k ≤ 11,<br>-28 ≤ l ≤ 27                      |
| <b>Reflections collected</b>                   | 11735                                                            | 20265                                                            |
| <b>Independent reflections</b>                 | 1794 [R <sub>int</sub> = 0.0482, R <sub>sigma</sub> =<br>0.0283] | 1843 [R <sub>int</sub> = 0.0835, R <sub>sigma</sub> =<br>0.0328] |
| <b>Refinement method</b>                       | Full-matrix least-squares on F <sub>o</sub> <sup>2</sup>         | Full-matrix least-squares on F <sub>o</sub> <sup>2</sup>         |
| <b>Goodness-of-fit on F<sup>2</sup></b>        | 1.130                                                            | 1.069                                                            |
| <b>Final R indices [I&gt;2sigma(I)]</b>        | R <sub>1</sub> = 0.0275, wR <sub>2</sub> = 0.0542                | R <sub>1</sub> = 0.0240, wR <sub>2</sub> = 0.0575                |
| <b>R indices (all data)<sup>a</sup></b>        | R <sub>1</sub> = 0.0335, wR <sub>2</sub> = 0.0569                | R <sub>1</sub> = 0.0281, wR <sub>2</sub> = 0.0597                |
| <b>Largest diff. peak and hole</b>             | 0.62/-1.00 e.Å <sup>-3</sup>                                     | 0.73/-1.06 e.Å <sup>-3</sup>                                     |

$$^a R_1 = \frac{\sum ||F_o| - |F_c||}{\sum |F_o|} \text{ and } wR_2 = \left[ \frac{\sum w(F_o^2 - F_c^2)^2}{\sum wF_o^4} \right]^{1/2} \text{ for } F_o^2 > 2\sigma(F_o^2).$$

**Table S2.** Selected bond lengths (Å) for Al(B(SeO<sub>3</sub>)<sub>3</sub>)H<sub>2</sub>O and Ga(B(SeO<sub>3</sub>)<sub>3</sub>)H<sub>2</sub>O.

| Al(B(SeO <sub>3</sub> ) <sub>3</sub> )H <sub>2</sub> O |          | Ga(B(SeO <sub>3</sub> ) <sub>3</sub> )H <sub>2</sub> O |          |
|--------------------------------------------------------|----------|--------------------------------------------------------|----------|
| Atom- Atom                                             | Length/Å | Atom- Atom                                             | Length/Å |
| Al1-O1                                                 | 1.893(3) | Ga1-O1                                                 | 1.973(3) |
| Al1-O4                                                 | 1.880(3) | Ga1-O4                                                 | 1.944(2) |
| Al1- O5#1                                              | 1.908(3) | Ga1- O5#1                                              | 1.956(2) |
| Al1- O7                                                | 1.876(3) | Ga1- O7                                                | 1.939(2) |
| Al1- O9#2                                              | 1.895(3) | Ga1- O9#2                                              | 1.954(2) |
| Al1-O1w                                                | 1.917(3) | Ga1- O1w                                               | 1.997(3) |
| B1- O2#3                                               | 1.463(5) | B1- O2#3                                               | 1.470(4) |
| B1- O3                                                 | 1.483(5) | B1- O3                                                 | 1.479(4) |
| B1- O6                                                 | 1.460(5) | B1- O6                                                 | 1.453(5) |
| B1- O8#2                                               | 1.476(5) | B1- O8#2                                               | 1.478(5) |
| Se1- O1                                                | 1.660(3) | Se1- O1                                                | 1.662(3) |
| Se1- O2                                                | 1.714(3) | Se1- O2                                                | 1.709(3) |
| Se1-O3                                                 | 1.730(3) | Se1-O3                                                 | 1.732(2) |
| Se2-O4                                                 | 1.689(3) | Se2-O4                                                 | 1.687(2) |
| Se2-O5                                                 | 1.682(3) | Se2-O5                                                 | 1.687(2) |
| Se2-O6                                                 | 1.739(3) | Se2-O6                                                 | 1.737(3) |
| Se3-O7                                                 | 1.683(3) | Se3-O7                                                 | 1.682(2) |
| Se3-O8                                                 | 1.744(3) | Se3-O8                                                 | 1.737(2) |
| Se3-O9                                                 | 1.674(3) | Se3-O9                                                 | 1.674(2) |

Sym

metry transformations used to generate equivalent atoms: #1  $3/2-x, 1/2+y, +z$ ;  
#2  $1/2-x, -1/2+y, +z$ ; #3  $1-x, -1/2+y, 1/2-z$ ;

**Table S3** Selected bond angles (°) for Al(B(SeO<sub>3</sub>)<sub>3</sub>)H<sub>2</sub>O and Ga(B(SeO<sub>3</sub>)<sub>3</sub>)H<sub>2</sub>O.

| Al(B(SeO <sub>3</sub> ) <sub>3</sub> )H <sub>2</sub> O |            | Ga(B(SeO <sub>3</sub> ) <sub>3</sub> )H <sub>2</sub> O |            |
|--------------------------------------------------------|------------|--------------------------------------------------------|------------|
| Atom-Atom-Atom                                         | Angle/°    | Atom-Atom-Atom                                         | Angle/°    |
| O1-Al1-O5#1                                            | 91.00(14)  | O1-Ga1-O5#1                                            | 92.20(11)  |
| O1-Al1-O9#2                                            | 90.94(14)  | O1-Ga1-O9#2                                            | 89.72(11)  |
| O1-Al1-O1W                                             | 176.33(13) | O1-Ga1-O1W                                             | 175.08(11) |
| O1-Al1-O4                                              | 96.11(13)  | O1-Ga1-O4                                              | 96.68(11)  |
| O1-Al1-O7                                              | 88.50(13)  | O1-Ga1-O7                                              | 87.43(11)  |
| O4-Al1-O5#1                                            | 90.81(13)  | O4-Ga1-O5#1                                            | 90.66(10)  |
| O4-Al1-O9#2                                            | 89.36(13)  | O4-Ga1-O9#2                                            | 89.20(10)  |
| O4-Al1-O1W                                             | 87.26(13)  | O4-Ga1-O1W                                             | 87.13(11)  |
| O4-Al1-O7                                              | 175.34(13) | O4-Ga1-O7                                              | 175.58(11) |
| O5#1-Al1-O1W                                           | 90.41(13)  | O5#1-Ga1-O1W                                           | 90.86(11)  |
| O5#1-Al1-O7                                            | 89.74(13)  | O5#1-Ga1-O7                                            | 90.79(10)  |
| O5#1-Al1-O9#2                                          | 178.03(13) | O5#1-Ga1-O9#2                                          | 178.08(11) |
| O7-Al1-O9#2                                            | 89.94(13)  | O7-Ga1-O9#2                                            | 89.21(10)  |
| O7-Al1-O1W                                             | 88.11(12)  | O7-Ga1-O1W                                             | 88.68(10)  |
| O9#2-Al1-O1W                                           | 87.63(13)  | O9#2-Ga1-O1W                                           | 87.22(11)  |
| O2#3-B1-O3                                             | 109.6(3)   | O2#3-B1-O3                                             | 109.6(3)   |
| O2#3-B1-O6                                             | 105.0(3)   | O2#3-B1-O6                                             | 106.0(3)   |
| O2#3-B1-O8 <sup>2</sup>                                | 109.1(3)   | O2#3-B1-O8 <sup>2</sup>                                | 107.2(3)   |
| O3-B1-O6                                               | 110.0(3)   | O3-B1-O6                                               | 109.8(3)   |
| O3-B1-O8#2                                             | 108.5(3)   | O3-B1-O8#2                                             | 109.3(3)   |
| O6-B1-O8#2                                             | 114.5(3)   | O6-B1-O8#2                                             | 114.8(3)   |
| O1-Se1-O2                                              | 98.99(14)  | O1-Se1-O2                                              | 98.61(13)  |
| O1-Se1-O3                                              | 99.79(15)  | O1-Se1-O3                                              | 99.62(13)  |
| O2-Se1-O3                                              | 91.84(14)  | O2-Se1-O3                                              | 92.98(12)  |
| O4-Se2-O5                                              | 98.56(13)  | O4-Se2-O5                                              | 97.10(11)  |
| O4-Se2-O6                                              | 98.44(14)  | O4-Se2-O6                                              | 98.47(12)  |
| O5-Se2-O6                                              | 97.50(13)  | O5-Se2-O6                                              | 98.06(12)  |
| O7-Se3-O8                                              | 96.22(14)  | O7-Se3-O8                                              | 96.39(11)  |
| O7-Se3-O9                                              | 96.89(13)  | O7-Se3-O9                                              | 96.16(12)  |
| O8-Se3-O9                                              | 99.36(14)  | O8-Se3-O9                                              | 99.59(12)  |

Symmetry transformations used to generate equivalent atoms: #1 3/2-x, 1/2+y, +z;

#2 1/2-x, -1/2+y, +z; #3 1-x, -1/2+y, 1/2-z;

**Table S4** Hydrogen bonds in Al(B(SeO<sub>3</sub>)<sub>3</sub>)H<sub>2</sub>O and Ga(B(SeO<sub>3</sub>)<sub>3</sub>)H<sub>2</sub>O.

| Al(B(SeO <sub>3</sub> ) <sub>3</sub> )H <sub>2</sub> O |          |          |          |         |
|--------------------------------------------------------|----------|----------|----------|---------|
| D-H...A                                                | d(D-H)/Å | d(H-A)/Å | d(D-A)/Å | D-H-A/° |
| O1W-H1WB...O7#1                                        | 0.86     | 2.17     | 2.912(4) | 144.7   |
| O1W-H1WA...O5#2                                        | 0.86     | 1.93     | 2.757(4) | 161.6   |
| Ga(B(SeO <sub>3</sub> ) <sub>3</sub> )H <sub>2</sub> O |          |          |          |         |
| D-H...A                                                | d(D-H)/Å | d(H-A)/Å | d(D-A)/Å | D-H-A/° |
| O1W-H1WB...O7#1                                        | 0.87     | 2.10     | 2.849(3) | 143.2   |
| O1W-H1WA...O5#2                                        | 0.87     | 1.92     | 2.753(3) | 159.5   |

Symmetry transformations used to generate equivalent atoms: #1 1/2+x,3/2-y,-z;  
#2 -1/2+x,3/2-y,-z

**Table S5** Bond valence calculations for oxygen atoms in Al(B(SeO<sub>3</sub>)<sub>3</sub>)H<sub>2</sub>O and Ga(B(SeO<sub>3</sub>)<sub>3</sub>)H<sub>2</sub>O.

| Al(B(SeO <sub>3</sub> ) <sub>3</sub> )H <sub>2</sub> O |              | Ga(B(SeO <sub>3</sub> ) <sub>3</sub> )H <sub>2</sub> O |              |
|--------------------------------------------------------|--------------|--------------------------------------------------------|--------------|
| Atom                                                   | Bond valence | Atom                                                   | Bond valence |
| O1                                                     | 2.02         | O1                                                     | 2.02         |
| O2                                                     | 2.09         | O2                                                     | 2.07         |
| O3                                                     | 1.98         | O3                                                     | 1.98         |
| O4                                                     | 1.91         | O4                                                     | 1.94         |
| O5                                                     | 1.92         | O5                                                     | 1.91         |
| O6                                                     | 1.99         | O6                                                     | 2.01         |
| O7                                                     | 1.96         | O7                                                     | 1.98         |
| O8                                                     | 1.95         | O8                                                     | 1.95         |
| O9                                                     | 1.97         | O9                                                     | 2.01         |
| O1w                                                    | 0.48         | O1w                                                    | 0.48         |

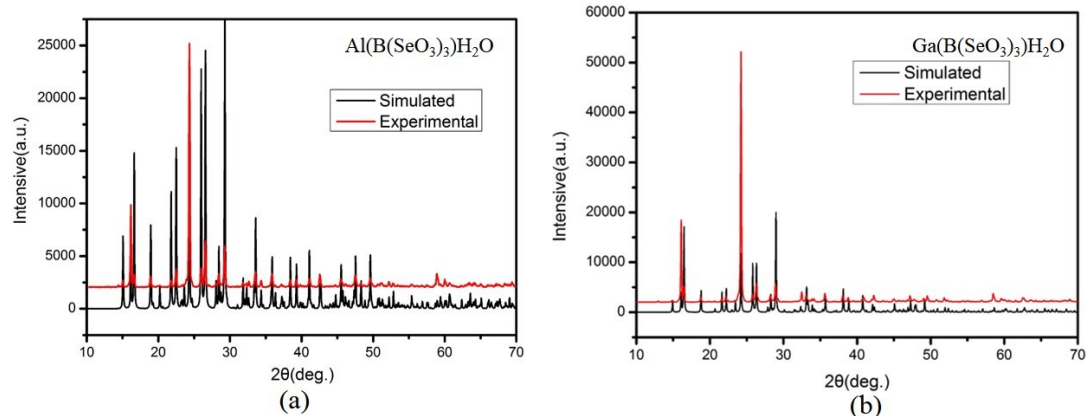

**Figure S1.** Powder X-ray diffraction patterns of  $\text{Al}(\text{B}(\text{SeO}_3)_3)\text{H}_2\text{O}$  (a) and  $\text{Ga}(\text{B}(\text{SeO}_3)_3)\text{H}_2\text{O}$  (b).

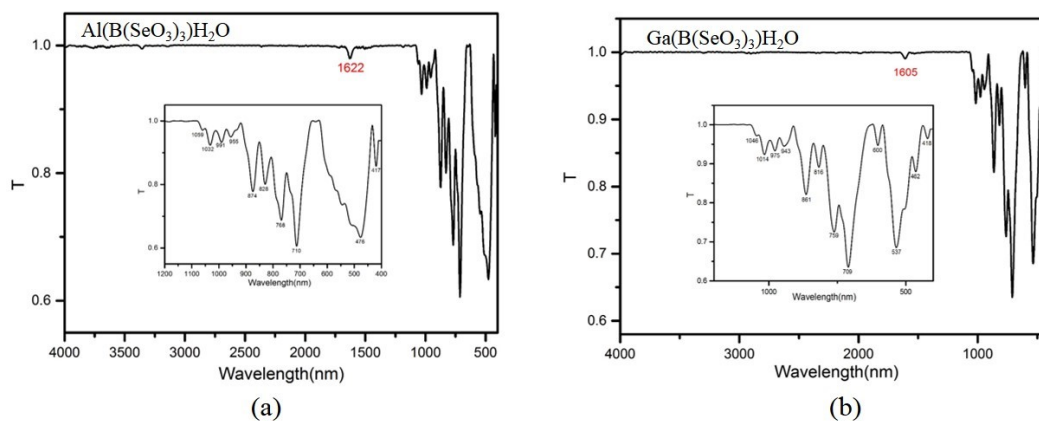

**Figure S2.** IR spectra of  $\text{Al}(\text{B}(\text{SeO}_3)_3)\text{H}_2\text{O}$  (a) and  $\text{Ga}(\text{B}(\text{SeO}_3)_3)\text{H}_2\text{O}$  (b).

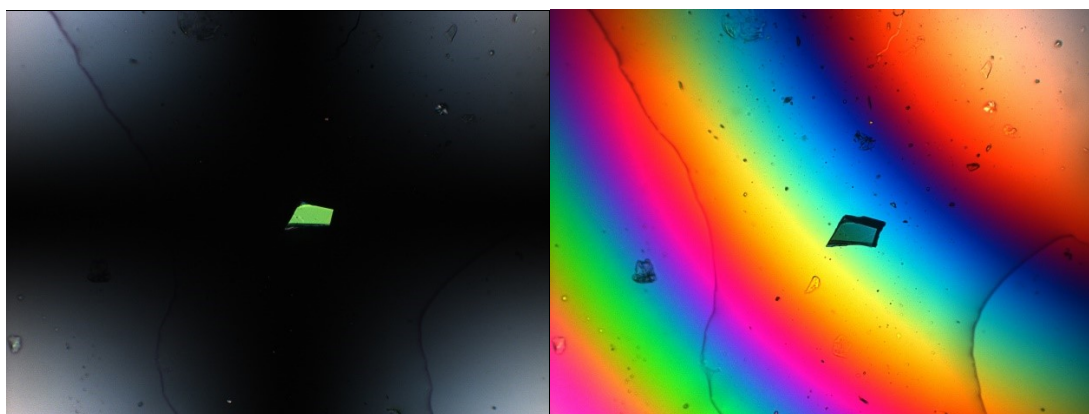

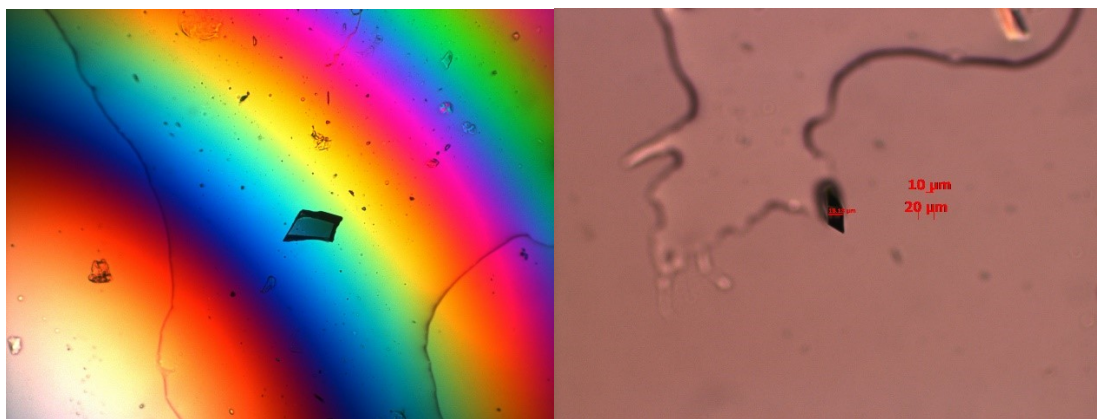

**Figure S3.** Photograph of  $\text{Al}(\text{B}(\text{SeO}_3)_3)\text{H}_2\text{O}$  for the measurement of birefringence.

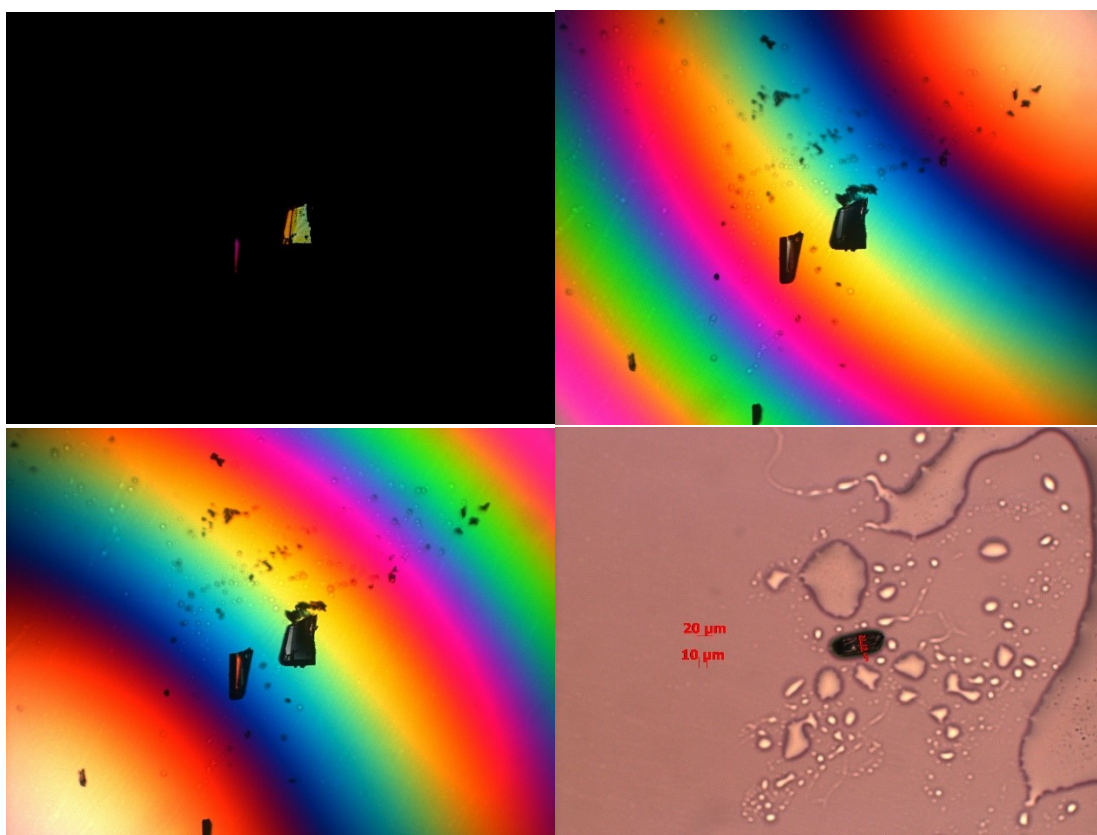

**Figure S4.** Photograph of  $\text{Ga}(\text{B}(\text{SeO}_3)_3)\text{H}_2\text{O}$  for the measurement of birefringence.



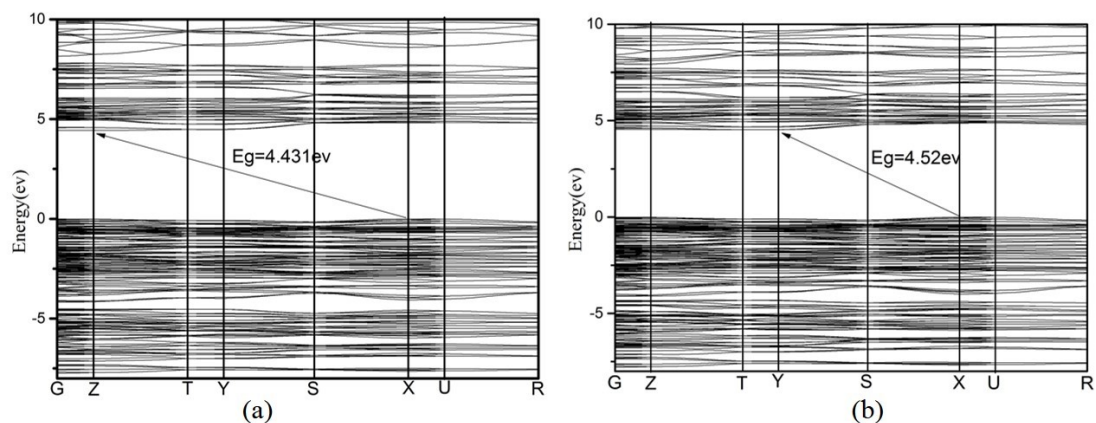

**Figure S5.** The calculated band structure of  $\text{Al}(\text{B}(\text{SeO}_3)_3)\text{H}_2\text{O}$  (a) and  $\text{Ga}(\text{B}(\text{SeO}_3)_3)\text{H}_2\text{O}$  (b).

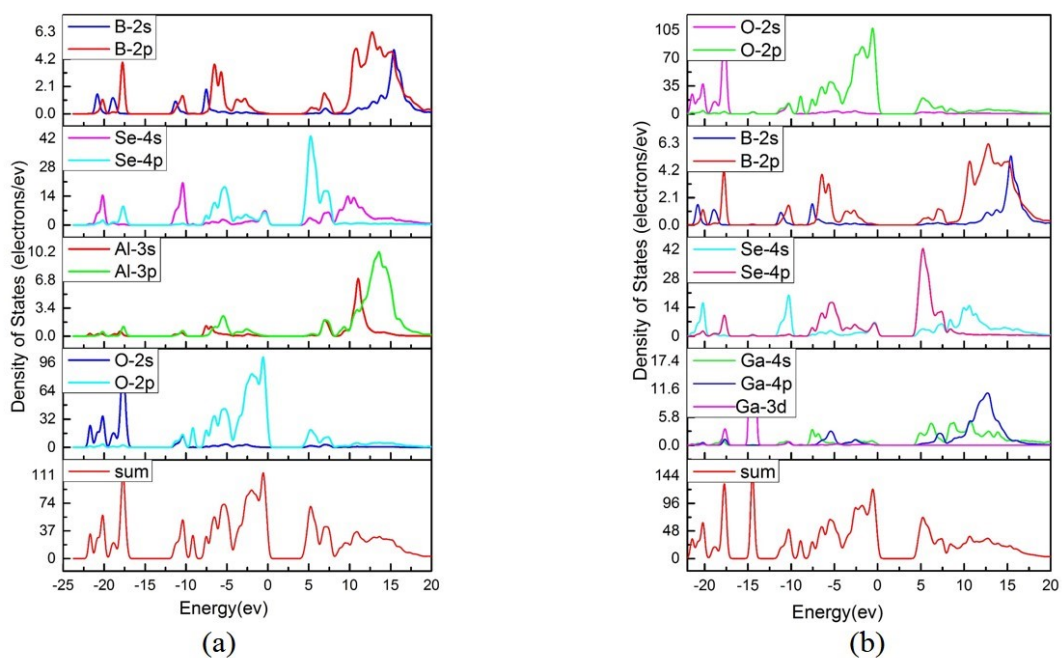

**Figure S6.** The graphs of scissor-added partial density of states and the largest tensors for  $\text{Al}(\text{B}(\text{SeO}_3)_3)\text{H}_2\text{O}$  (a) and  $\text{Ga}(\text{B}(\text{SeO}_3)_3)\text{H}_2\text{O}$  (b).
